# Supplementary material for: A post-reduction strategy to enhance near-infrared-II emission from Li4SrCa(SiO4)2:Cr4+ phosphors
Source: Royal Society of Chemistry journal article supplement (doi:10.1039/d4tc02781g), 2024-01-01
Supplement: d4tc02781g1.pdf [file d4tc02781g1.pdf]

## Electronic supplementary information

# A post-reduction strategy to enhance near-infrared-II emission from $\text{Li}_4\text{SrCa}(\text{SiO}_4)_2:\text{Cr}^{4+}$ phosphors

Yixin Sun,<sup>a</sup> Yining Wang,<sup>a</sup> Minliang Deng,<sup>a</sup> Xiaole Xing,<sup>a</sup> Yiying Zhu,<sup>a</sup> and Mengmeng Shang,<sup>\*a</sup>

<sup>a</sup>Key Laboratory for Liquid-Solid Structural Evolution and Processing of Materials Ministry of Education, School of Material Science and Engineering, Shandong University, 17923 Jingshi Road, Jinan 250061, P. R. China. E-mail: mmshang@sdu.edu.cn

**Table S1** Main parameters of processing and refinement results of LSCS:0.1%Cr<sup>4+</sup> and LSCS:3%Cr<sup>4+</sup>.

| Compound                   | LSCS:0.1%Cr <sup>4+</sup> | LSCS:3%Cr <sup>4+</sup> |
|----------------------------|---------------------------|-------------------------|
| <i>a</i> , Å               | 4.9757                    | 4.9757                  |
| <i>b</i> , Å               | 9.9216                    | 9.9235                  |
| <i>c</i> , Å               | 14.0403                   | 14.0395                 |
| <i>V</i> , Å <sup>3</sup>  | 693.13                    | 693.22                  |
| <i>α</i> , °               | 90                        | 90                      |
| <i>β</i> , °               | 90                        | 90                      |
| <i>γ</i> , °               | 90                        | 90                      |
| <i>R</i> <sub>wp</sub> , % | 10.51                     | 11.21                   |
| <i>R</i> <sub>p</sub> , %  | 7.81                      | 8.03                    |
| <i>χ</i> <sup>2</sup>      | 3.032                     | 3.222                   |

**Table S2** Luminescence properties of Cr<sup>4+</sup>-doped Si-based NIR luminescent materials.

| Materials                                            | <i>λ</i> <sub>ex</sub> , <i>λ</i> <sub>em</sub><br>(nm) | Emission<br>Range (nm) | FWHM<br>(nm) | IQE         | Ref.             |
|------------------------------------------------------|---------------------------------------------------------|------------------------|--------------|-------------|------------------|
| Zn <sub>2</sub> SiO <sub>4</sub> :Cr <sup>4+</sup>   | 800, 1350                                               | 1100 - 1600            | 300          | 1.7%        | [S1]             |
| Mg <sub>2</sub> SiO <sub>4</sub> :Cr <sup>4+</sup>   | 800, 1130                                               | 800 - 1500             | 220          | 2.0%        | [S1]             |
| Li <sub>2</sub> ZnSiO <sub>4</sub> :Cr <sup>4+</sup> | 800, 1170                                               | 1000 - 1600            | 240          | 17%         | [S1]             |
| Li <sub>2</sub> MgSiO <sub>4</sub> :Cr <sup>4+</sup> | 800, 1210                                               | 1000 - 1500            | 230          | 2.2%        | [S1]             |
| Li <sub>2</sub> CaSiO <sub>4</sub> :Cr <sup>4+</sup> | 680, 1150                                               | 1000 - 1500            | ~ 200        | --          | [S2]             |
| <b>LSCS:Cr<sup>4+</sup></b>                          | <b>465, 1215</b>                                        | <b>900 - 1600</b>      | <b>233</b>   | <b>2.2%</b> | <b>This work</b> |
| <b>LSCSH:Cr<sup>4+</sup></b>                         | <b>465, 1215</b>                                        | <b>900 - 1600</b>      | <b>228</b>   | <b>27%</b>  | <b>This work</b> |

**Table S3** Main parameters of processing and refinement results of LSCSH:0.1%Cr<sup>4+</sup> and LSCSH:3%Cr<sup>4+</sup>.

| Compound             | LSCSH:0.1%Cr <sup>4+</sup> | LSCSH:3%Cr <sup>4+</sup> |
|----------------------|----------------------------|--------------------------|
| $a$ , Å              | 4.9778                     | 4.9776                   |
| $b$ , Å              | 9.9255                     | 9.9255                   |
| $c$ , Å              | 14.0464                    | 14.0475                  |
| $V$ , Å <sup>3</sup> | 693.99                     | 694.02                   |
| $\alpha$ , °         | 90                         | 90                       |
| $\beta$ , °          | 90                         | 90                       |
| $\gamma$ , °         | 90                         | 90                       |
| $R_{wp}$ , %         | 10.84                      | 12.08                    |
| $R_p$ , %            | 7.95                       | 8.78                     |
| $\chi^2$             | 2.701                      | 3.612                    |

**Table S4** Temperature sensing performance of various materials based on spectral shift ( $\Delta\lambda$ ) and decay times ( $\tau$ ).

| Materials                                                                            | Method                            | Maximum $S_R$ (K <sup>-1</sup> ) | Ref.        |
|--------------------------------------------------------------------------------------|-----------------------------------|----------------------------------|-------------|
| Ca <sub>2</sub> Al <sub>2</sub> SiO <sub>7</sub> :Cr <sup>4+</sup>                   | $\Delta\lambda$                   | 0.61%                            | [S3]        |
|                                                                                      | $\tau$                            | 0.25%                            |             |
| CaYGaO <sub>4</sub> :Cr <sup>4+</sup>                                                | $\Delta\lambda$                   | 5.82% @100 K                     | [S4]        |
|                                                                                      | $\tau$                            | 0.78% @350 K                     |             |
| Sr <sub>4</sub> Al <sub>14</sub> O <sub>25</sub> :Mn <sup>4+</sup>                   | $\tau$                            | 1.5% @ 420 K                     | [S5]        |
| CaZnOS:Mn <sup>2+</sup>                                                              | $\tau$                            | 1.71% @ 150 K                    | [S6]        |
| Ba <sub>3</sub> (VO <sub>4</sub> ) <sub>2</sub> :Mn <sup>4+</sup> , Er <sup>3+</sup> | $\tau$                            | 1.71% @ 150 K                    | [S7]        |
| <b>Li<sub>4</sub>SrCa(SiO<sub>4</sub>)<sub>2</sub>:Cr<sup>4+</sup></b>               | <b><math>\Delta\lambda</math></b> | <b>1.71% @ 150 K</b>             | <b>This</b> |
|                                                                                      | <b><math>\tau</math></b>          | <b>1.69% @ 425 K</b>             | <b>work</b> |

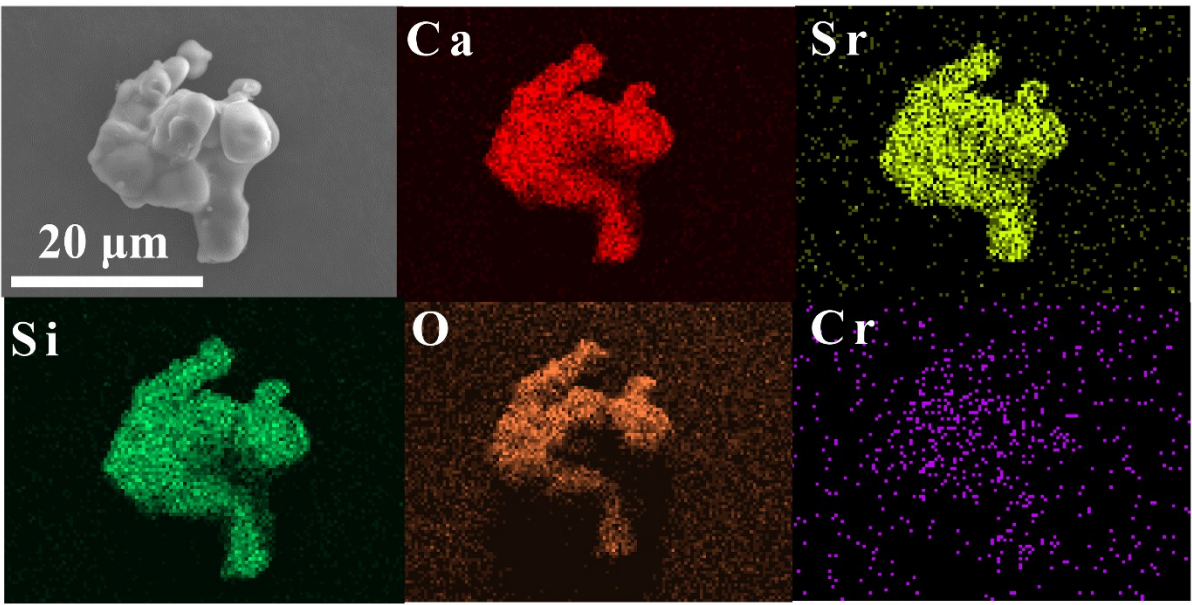

**Fig. S1** SEM image and elemental mapping images of LSCS:3%Cr<sup>4+</sup>.

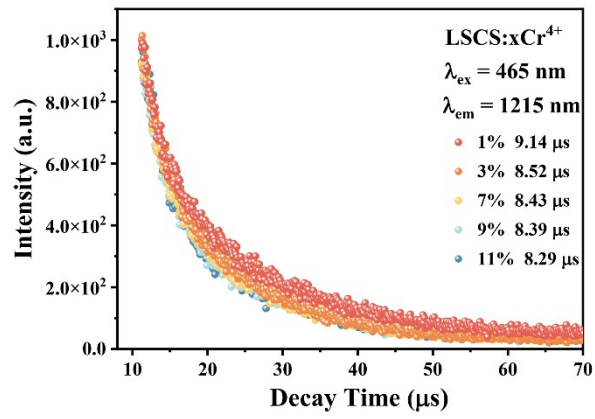

**Fig. S2** Fluorescence decay curves of LSCS:xCr<sup>4+</sup> (x = 1% ~ 11%).

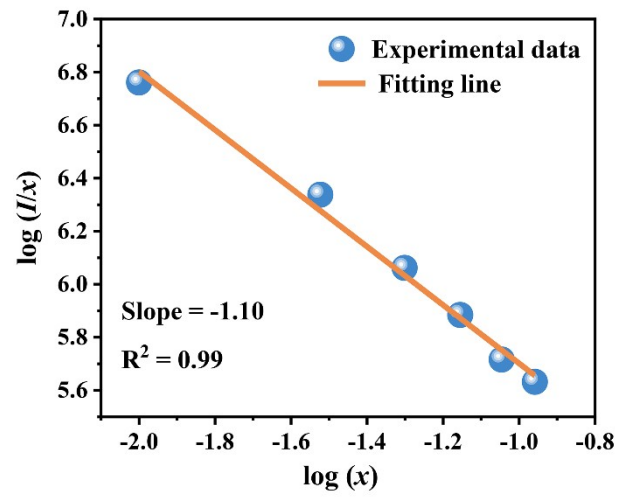

**Fig. S3** The linear fitting of  $\log(I/x)$  versus  $\log(x)$  of LSCS: $x\text{Cr}^{4+}$  ( $x = 1\% \sim 11\%$ ).

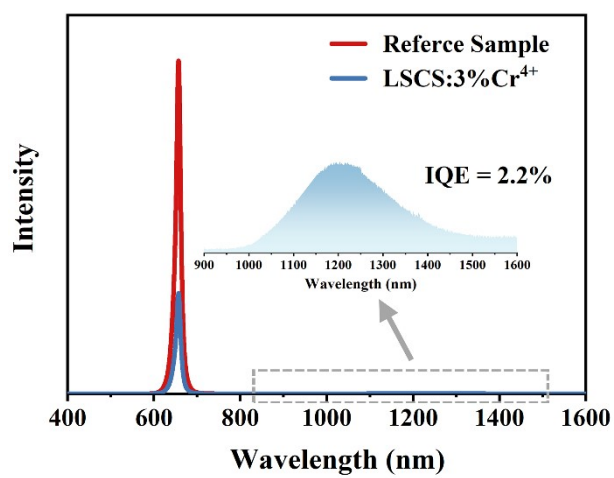

**Fig. S4** The quantum efficiency of LSCS:3%Cr<sup>4+</sup>.

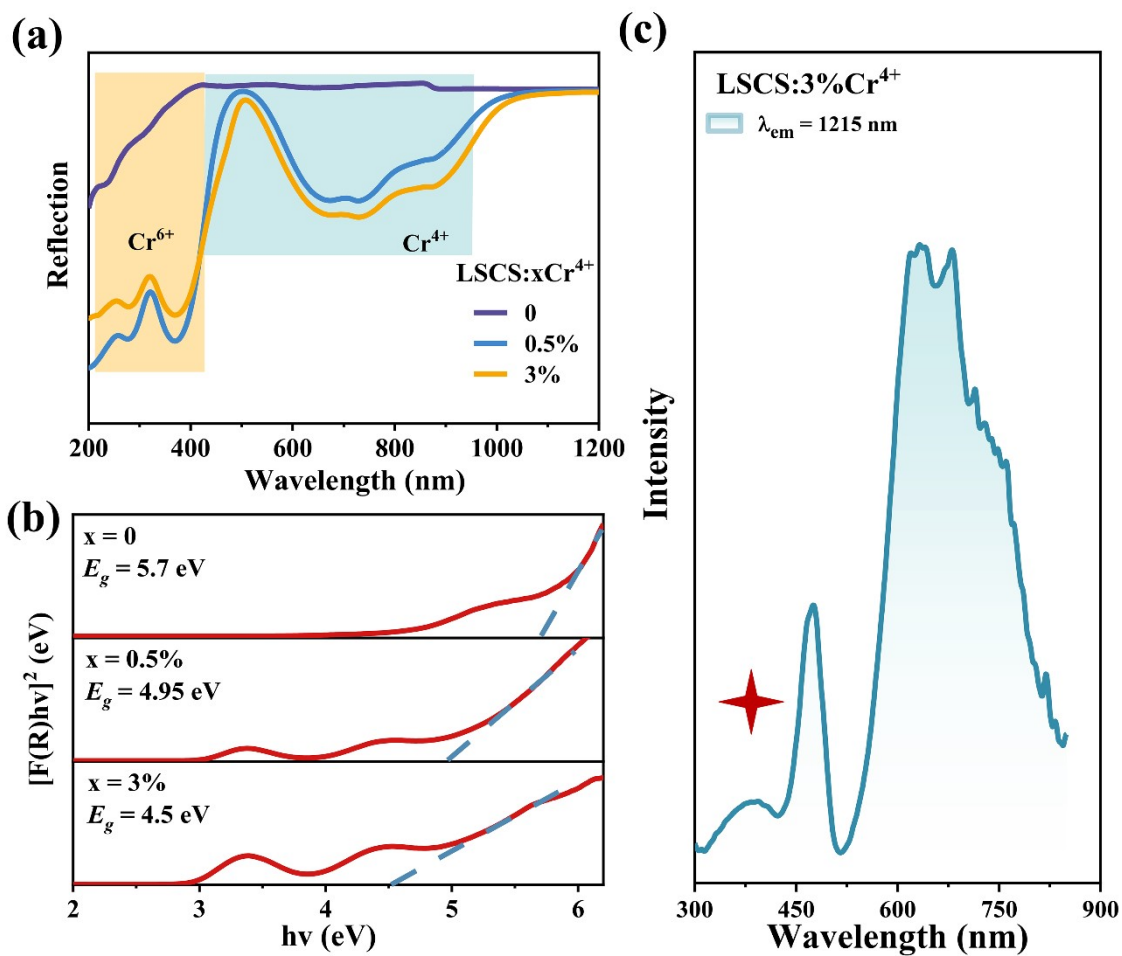

**Fig. S5** (a) UV-vis-NIR DR spectra and (b) the optical band gap of LSCS: $x\text{Cr}^{4+}$  ( $x = 0, 0.5\%$  and  $3\%$ ). (c) The PLE spectrum of the LSCS:3% $\text{Cr}^{4+}$ .



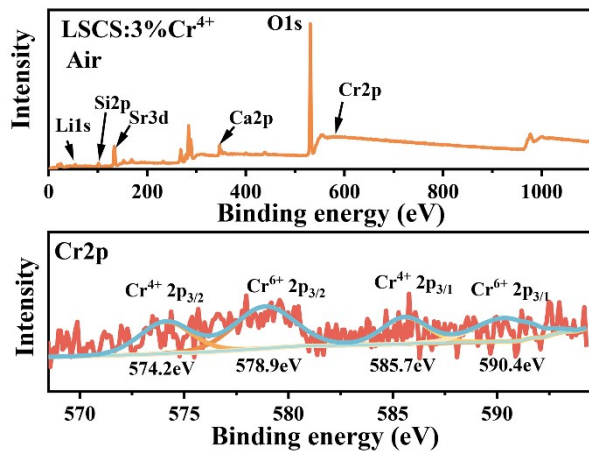

**Fig. S6** The XPS survey spectrum and high-resolution XPS spectrum of Cr2p level of LSCS:3%Cr<sup>4+</sup>.

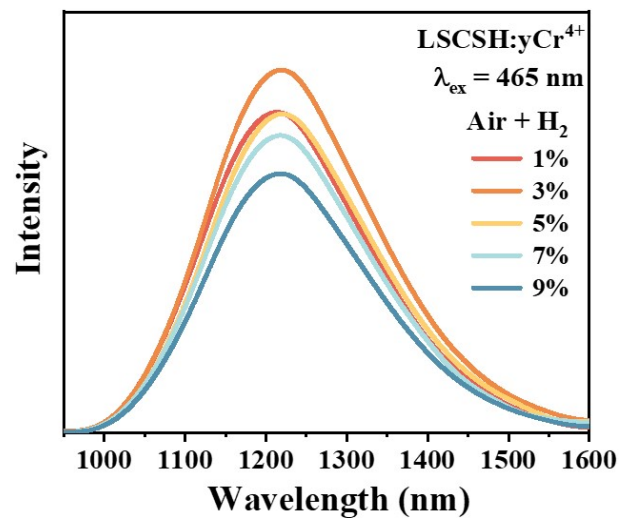

**Fig. S7** The PL spectra of LSCSH:yCr<sup>4+</sup>.

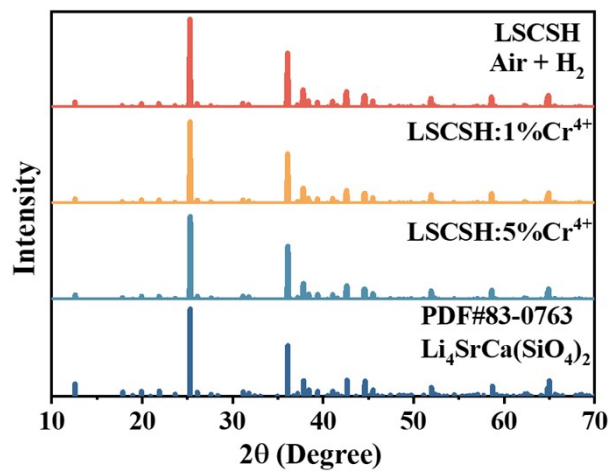

**Fig. S8** XRD patterns of LSCSH:yCr<sup>4+</sup> (y = 0, 1% and 5%).

**(a)**

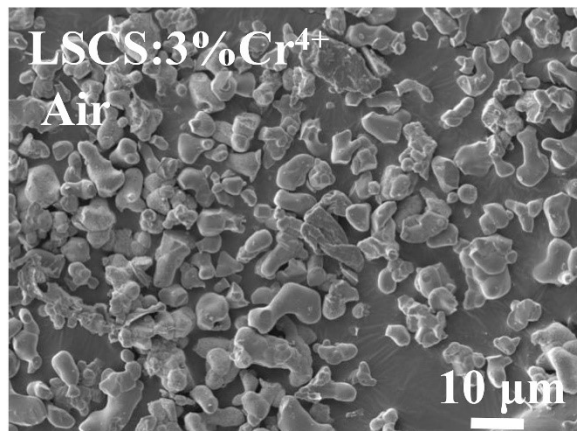

**(b)**

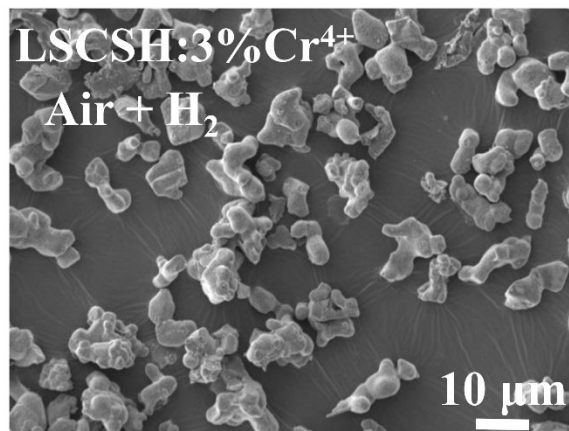

**Fig. S9** SEM images of (a) LSCS:3%Cr<sup>4+</sup> and (b) LSCSH:3%Cr<sup>4+</sup>.

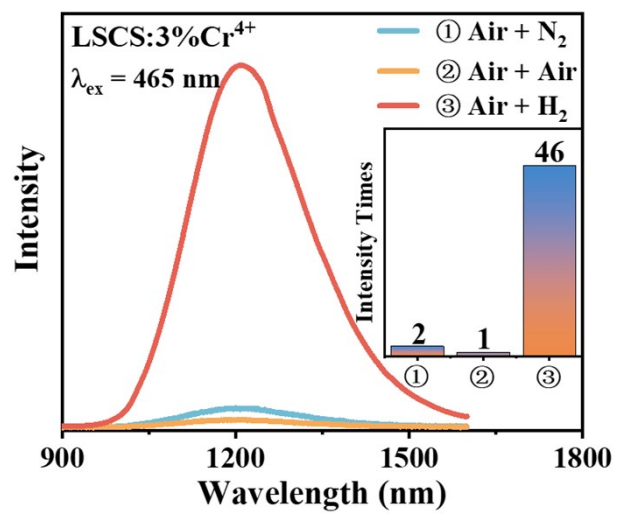

**Fig. S10** The emission spectra of LSCS:3%Cr<sup>4+</sup> under different sintering conditions.

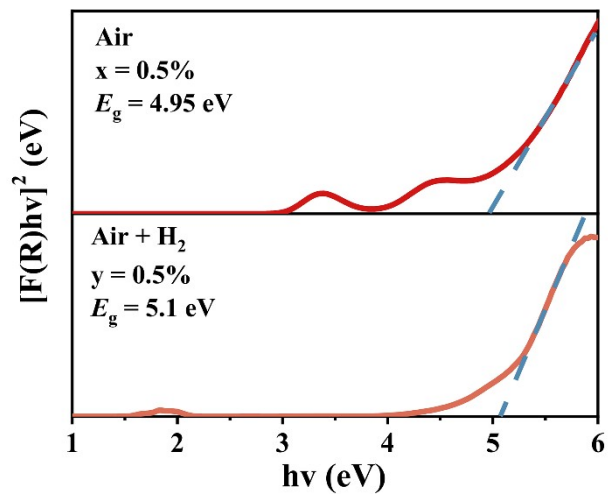

**Fig. S11** The optical band gap of LSCS:0.5%Cr<sup>4+</sup> and LSCSH:0.5%Cr<sup>4+</sup>.

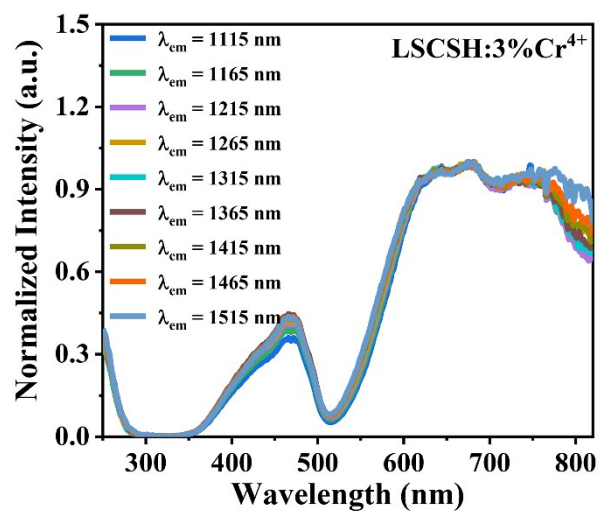

**Fig. S12** Monitoring normalized PLE spectra at 1115 - 1515 nm of LSCSH:3%Cr<sup>4+</sup>.

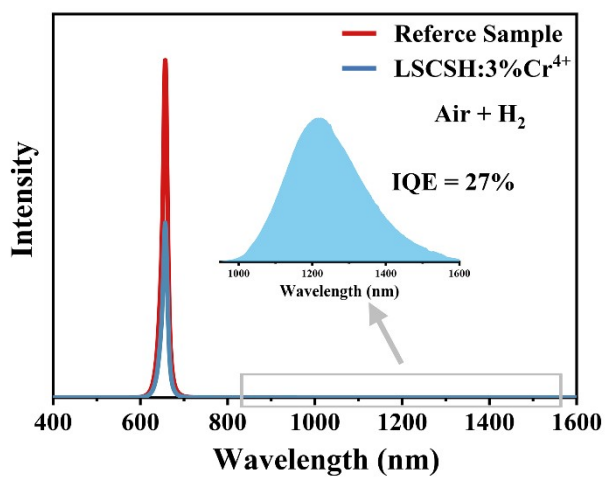

**Fig. S13** The quantum efficiency of LSCSH:3%Cr<sup>4+</sup>.



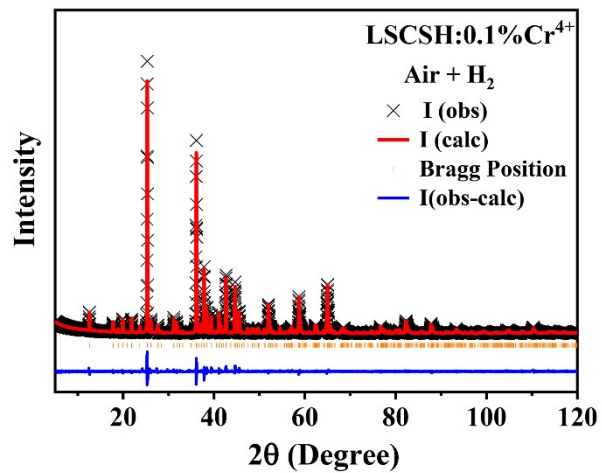

**Fig. S14** The Rietveld refinement of LSCSH:0.1%Cr<sup>4+</sup>.

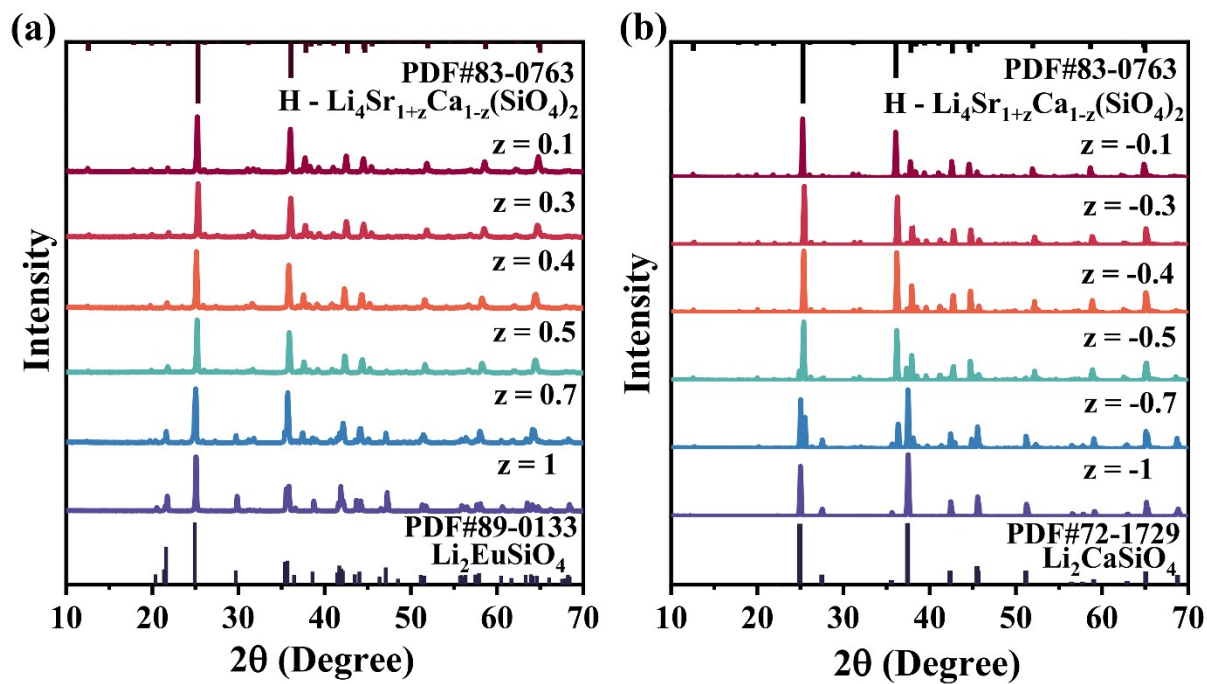

Fig. S15 XRD patterns of the  $\text{H-Li}_4\text{Sr}_{1+z}\text{Ca}_{1-z}(\text{SiO}_4)_2:3\%\text{Cr}^{4+}$  (a)  $z = 0.1 \sim 1$  and (b)  $z = -1 \sim -0.1$ .

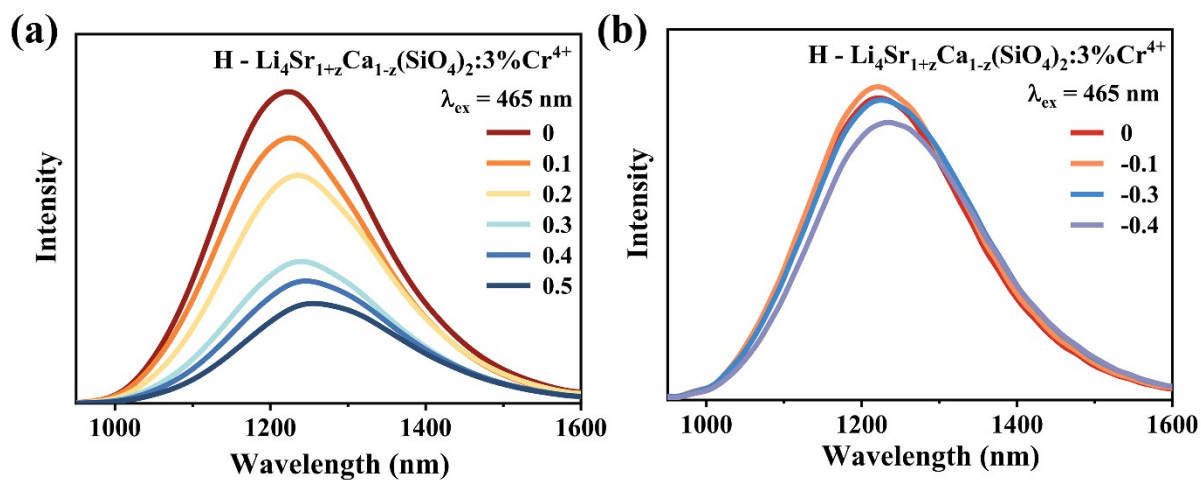

**Fig. S16** The PL spectra of  $\text{H - Li}_4\text{Sr}_{1+z}\text{Ca}_{1-z}(\text{SiO}_4)_2:3\%\text{Cr}^{4+}$  (a)  $z = 0 \sim 0.5$  and (b)  $z = -0.4 \sim 0$ .

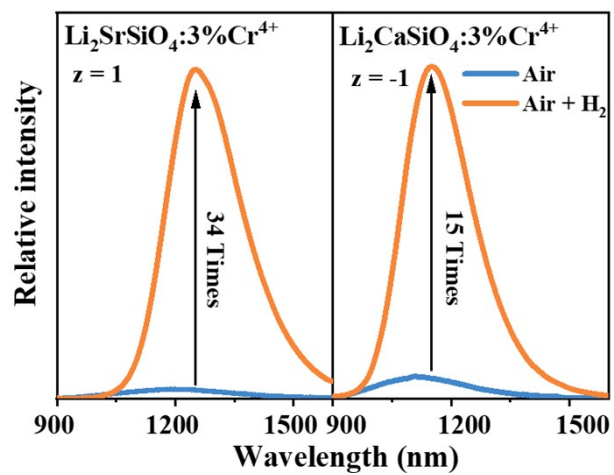

**Fig. S17** The PL spectral intensity increased times of  $\text{Li}_2\text{SrSiO}_4:3\%\text{Cr}^{4+}$  and  $\text{Li}_2\text{CaSiO}_4:3\%\text{Cr}^{4+}$  by post-reduction strategy.

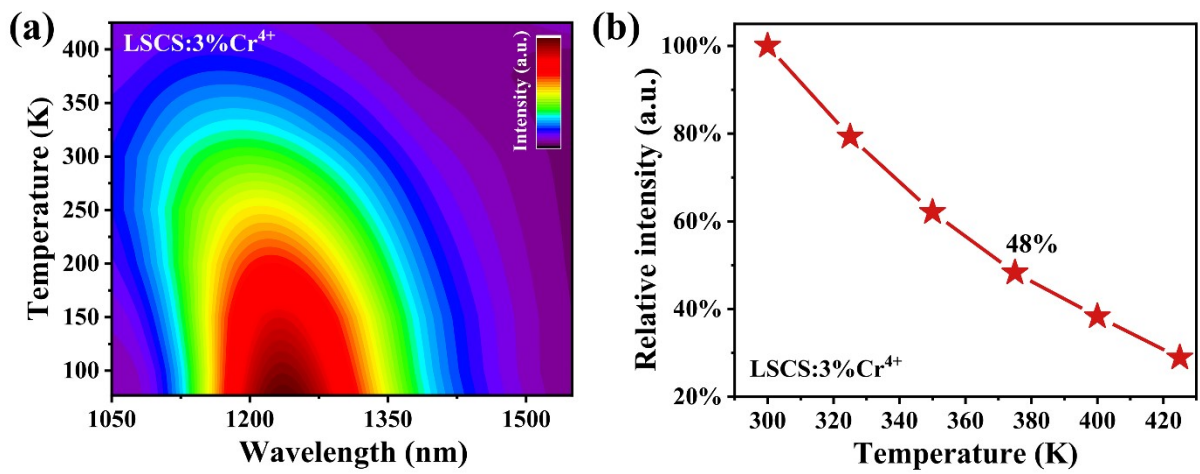

**Fig. S18** Temperature-dependent (a) PL spectra and (b) relative emission intensity of LSCS:3%Cr<sup>4+</sup>.

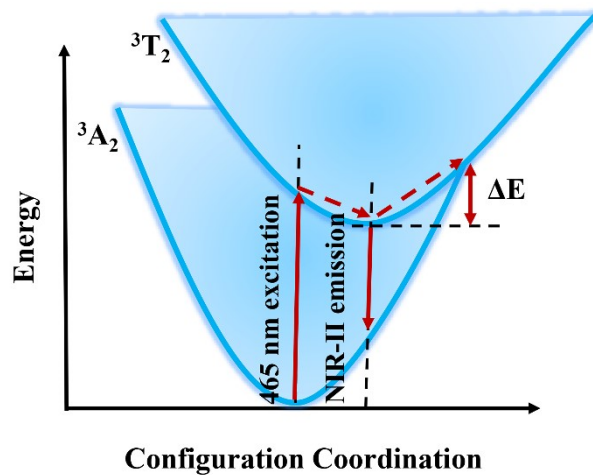

**Fig. S19** Configurational coordinate diagram illustrating band broadening and thermal quenching behaviors of LSCSH:yCr<sup>4+</sup>.

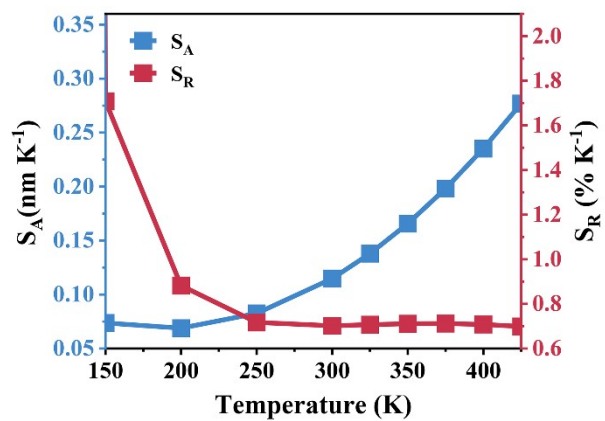

**Fig. S20** Calculated  $S_A$  and  $S_R$  values via  $\Delta\lambda$  changing with temperature.

To insight into the the nature of ion - ion interaction in the lattice, the critical distance  $R_c$  can be computed using the following formula:<sup>[S8]</sup>

$$R_c \approx 2 \left( \frac{3V}{4\pi X_c N} \right)^{\frac{1}{3}} \quad (S1)$$

Within this equation,  $V$  represents the unit cell volume,  $X_c$  stands for the critical concentration and  $N$  signifies the number of sites within a unit cell where  $\text{Cr}^{4+}$  ions can substitute. In this scenario,  $V = 693.22 \text{ \AA}^3$ ,  $N = 4$  and  $X_c = 0.03$ . The computed value for  $R_c$  is  $22.26 \text{ \AA}$ , significantly exceeding the critical distance of  $5 \text{ \AA}$  for exchange interaction. Therefore, the non-radiative energy transfer mechanism is multipolar interaction. The type of interaction between Cr ions is calculated by eqn. S2:<sup>[S9]</sup>

$$\frac{I}{x} = K \left[ 1 + \beta(x)^{\frac{\theta}{3}} \right]^{-1} \quad (S2)$$

Where  $I$  represents for the PL spectra intensity and  $x$  stands for the corresponding activator concentration,  $K$  and  $\beta$  are constants. Fig. S3 depicts the linear fitting of  $\log(I/x)$  to  $\log(x)$ , yielding a slope of  $-1.10$  and  $\theta$  as  $3.30$ . This indicates that the energy transfer between neighboring ions serves as the main concentration quenching mechanism of  $\text{LSCS:xCr}^{4+}$ , since  $\theta$  is close to  $3$ .



The optical band gap can be calculated using the following Kubelka-Munk formula:<sup>[S10,S11]</sup>

$$F(R) = \frac{(1 - R)^2}{2R} \quad (S3)$$

$$[F(R) \times hv]^{1/n} = A(hv - E_g) \quad (S4)$$

where  $F(R)$  is the absorption,  $R$  is the reflectance,  $hv$  is the photon energy,  $A$  is the absorption constant, and  $E_g$  is the optical band gap. The  $n$  values determined by the directly allowed transition, directly forbidden transition, indirectly allowed transition, and indirectly forbidden transition are 1/2, 3/2, 2, and 3, respectively. The electronic transition of this garnet belongs to directly allowed transition ( $n = 1/2$ ), so the  $E_g$  is estimated to be 5.7 eV (LSCS), 4.95 eV (LSCS:0.5%Cr<sup>4+</sup>), 4.5 eV (LSCS:3%Cr<sup>4+</sup>) and 5.1 eV (LSCSH:0.5%Cr<sup>4+</sup>) respectively.

The activation energy ( $\Delta E$ ) can further evaluate thermal stability and can be computed using the Arrhenius formula:<sup>[S12-S14]</sup>

$$I_T = \frac{I_0}{1 + A \exp\left(\frac{-\Delta E}{kT}\right)} \quad (S5)$$

Where,  $I_T$  is the luminous intensity at temperature  $T$ ,  $I_0$  is the original intensity,  $A$  is a constant, and  $k$  is  $8.617 \times 10^{-5}$  eV K<sup>-1</sup> (Boltzmann constant). The calculated  $\Delta E = 0.19$  eV for LSCSH:3%Cr<sup>4+</sup>.

## References

- [S1] Y. Zhuang, S. Tanabe, J. Qiu, *J. Am. Ceram. Soc.*, 2014, **97**, 3519-3523.
- [S2] M. Y. Sharonov, A. B. Bykov, V. Petričević, R. R. Alfano, *Opt. Commun.*, 2004, **231**, 273.
- [S3] X.Chen, S.Liu, K.Huang, J.Nie, R.Kang, X.Tian, S.Zhang, Y.Li, J. Qiu, *Chem. Eng. J.*, 2020, **396**, 125201.
- [S4] Y. Wang, G. Liu, Z. Xia, *Laser Photon. Rev.*, 2023, 2300717.
- [S5] M. Pieprz, W. Piotrowski, P. Woźny, M. Runowski, L. Marciniak, *Adv. Opt. Mater.*, 2023, 2301316.
- [S6] T. Zheng, M. Runowski, I.R. Martín, K. Soler-Carracedo, L. Peng, M. Skwierczyńska, M. Sójka, J. Barzowska, S. Mahlik, H. Hemmerich, F. Rivera-López, P. Kulpiński, V. Lavín, D. Alonso, D. Peng, *Adv. Mater.*, 2023, 2304140.
- [S7] W. M. Piotrowski, R. Marin, M. Szymczak, E. M. Rodríguez, D.H. Ortgies, P. Rodríguez-Sevilla, M.D. Dramićanin, D. Jaque, L. Marciniak, *Adv. Opt. Mater.*, 2023, **11**, 2202366.
- [S8] G. Guo, T. Yin, M. Dong, J. Nie, Y. Zhang, Z. Liu, F. Wang, X. Li, *Opt. Express*, 2023, **31**, 25978-25992.
- [S9] B. Bai, P. Dang, D. Huang, H. Lian, J. Lin, *Inorg. Chem.*, 2020, **59**, 13481-13488.
- [S10] C. Li, J. Zhong, *Chem. Mater.*, 2022, **34**, 8418.
- [S11] T. Gao, W. Zhuang, R. Liu, Y. Liu, X. Chen, Y. Xue, *J. Alloys Compd.*, 2020, **848**, 156557.
- [S12] G. Guo, T. Yin, M. Dong, J. Nie, Y. Zhang, Z. Liu, F. Wang, X. Li, *Opt. Express*, 2023, **31**, 25978-25992.
- [S13] T. Yang, L. Chu, T. Zhang, Q. Zhou, Y. Qin, Z. Wang, J. Wan, M. Wu, *J. Alloys Compd.*, 2023, **965**, 171336.
- [S14] J. Li, B. Liu, G. Liu, Q. Che, Y. Lu, Z. Liu, *J. Rare Earths.*, 2023, **41**, 1689.
